# Supplementary material
Source: Elsevier journal article supplement (https://www.sciencedirect.com/science/article/pii/S0300893222002780)
Supplement: mmc1 [file S0300893222002780:mmc1.pdf]

## SUPPLEMENTARY DATA

Table 1 of the supplementary data

Comparison of excluded and included patients (due to missing data)

|                                             | Excluded<br>(n = 43) | Included<br>(n = 224) | P    |
|---------------------------------------------|----------------------|-----------------------|------|
| <i>Characteristic</i>                       |                      |                       |      |
| Age, y                                      | 52.19 ± 10.2         | 51.99 ± 9.9           | .964 |
| Diabetes mellitus                           | 2 (4.6)              | 4 (1.8)               | .245 |
| Hypertension                                | 18 (41.9)            | 73 (32.6)             | .240 |
| Smoker                                      | 16 (37.2)            | 57 (25.4)             | .113 |
| Dyslipidemia                                | 15 (34.9)            | 80 (35.7)             | .917 |
| Hypothyroidism                              | 4 (9.3)              | 32 (14.3)             | .381 |
| Migraines                                   | 6 (13.9)             | 46 (20.5)             | .318 |
| Depression                                  | 7 (16.3)             | 35 (15.6)             | .934 |
| Peripartum                                  | 2 (4.6)              | 4 (1.8)               | .245 |
| Postmenopausal                              | 22 (51.2)            | 87 (38.8)             | .132 |
| <i>Clinical presentation and management</i> |                      |                       |      |
| STEMI                                       | 20 (46.5)            | 107 (47.7)            | .879 |
| NSTEMI                                      | 16 (37.2)            | 105 (46.8)            | .244 |
| Cardiac arrest                              | 3 (6.9)              | 10 (4.5)              | .483 |
| LVEF                                        | 54.3 ± 11.2          | 54.2 ± 8.8            | .981 |
| LM or LAD                                   | 23 (53.5)            | 132 (58.9)            | .508 |
| Angiotypes 2A & 3                           | 16 (37.2)            | 74 (33)               | .595 |
| Revascularization                           | 9 (20.9)             | 82 (36.6)             | .047 |

LAD, left anterior descending coronary artery; LM, left main coronary artery; LVEF, left ventricular ejection fraction; NSTEMI, non–ST-elevation myocardial infarction; STEMI, ST-elevation myocardial infarction.

Data are expressed as No. (%) or mean ± standard deviation.

**Table 2 of the supplementary data**

Composite outcome predictor analysis with multivariable Cox regression

| Predictor              | Univariate analysis |        | Multivariate analysis |      |
|------------------------|---------------------|--------|-----------------------|------|
|                        | HR                  | P      | HR                    | P    |
| Age, y                 | 0.98 [0.95-1.01]    | 0.289* | 1.02 [0.97-1.08]      | .373 |
| Hypertension           | 0.75 [0.35-1.63]    | 0.471  |                       |      |
| Diabetes mellitus      | 1.18 [0.16-8.69]    | 0.868  |                       |      |
| Smoker                 | 1.91 [0.93-3.91]    | 0.075  | 2.06 [0.83-5.11]      | .117 |
| Peripartum             | 3.79 [0.51-28.47]   | 0.294  |                       |      |
| Postmenopausal         | 1.02 [0.39-2.64]    | 0.970  |                       |      |
| Migraines              | 0.187 [0.03-1.40]   | 0.210  |                       |      |
| Hormone therapy        | 2.72 [1.17-6.37]    | 0.020  | 3.53 [1.30-9.61]      | .013 |
| STEMI                  | 1.02 [0.50-2.09]    | 0.948  |                       |      |
| Cardiac arrest         | 1.72 [0.41-7.20]    | 0.460  |                       |      |
| Multivessel disease    | 2.56 [0.94-6.99]    | 0.066  | 2.82 [0.95-8.34]      | .060 |
| Angiotypes 2A&3        | 2.04 [1.01-4.15]    | 0.046  | 4.27 [1.70-10.72]     | .002 |
| PCI as first treatment | 1.69 [0.71-3.53]    | 0.257  |                       |      |
| DAPT                   | 1.94 [0.88-4.30]    | 0.099  | 4.07 [1.31-12.61]     | .015 |

DAPT, dual antiplatelet therapy; HR, hazard ratio; PCI, percutaneous coronary intervention; STEMI, ST-elevation myocardial infarction.

Table 3 of the supplementary data

Complementary analysis with inverse probability weighting (IPTW) and multivariable Cox regression

| Covariables                                                                              | Standardized differences |            |             |          |
|------------------------------------------------------------------------------------------|--------------------------|------------|-------------|----------|
|                                                                                          | Raw                      | Weighted   |             |          |
| Age in IQR                                                                               | −0.5208671               | −0.0248753 |             |          |
| Current smoker                                                                           | 0.1580324                | −0.0734502 |             |          |
| Hypertension                                                                             | −0.3120803               | 0.0354216  |             |          |
| Dyslipidemia                                                                             | −0.3940913               | −0.0394    |             |          |
| Migraines                                                                                | 0.3634306                | 0.0140772  |             |          |
| Overidentification test for covariate balance: chi-square (6) = 2.55727; <i>P</i> = .862 |                          |            |             |          |
|                                                                                          | HR                       | CI lower   | CI superior | <i>P</i> |
| Unadjusted effect after IPTW <sup>a</sup>                                                | 2.87815                  | 2.87815    | 7.699214    | .035     |
| Adjustment by all covariables <sup>b</sup>                                               | 3.647423                 | 1.512767   | 8.794274    | .004     |
| Adjustment by STEMI                                                                      | 3.117929                 | 1.122637   | 8.659507    | .029     |
| Adjustment by multivessel disease                                                        | 3.000628                 | 1.150235   | 7.827761    | .025     |
| Adjustment by angiotype 2A & 3                                                           | 2.648727                 | 1.056888   | 6.638123    | .038     |
| Adjustment by TIMI flow 3                                                                | 2.762212                 | 1.076756   | 7.085932    | .035     |
| Adjustment by DAPT                                                                       | 3.603976                 | 1.493362   | 8.697583    | .004     |

CI, confidence Interval; DAPT: Dual antiplatelet therapy; IPTW, inverse probability weighting; IQR, interquartile range; STEMI, ST elevation myocardial infarction; TIMI, thrombolysis in myocardial infarction.

All the standardized differences were less than 0.10, indicating that all meaningful differences in means and frequencies of measured baseline covariates had been balanced by weighting.

<sup>a</sup> hazard ratio after applying the IPTW (with the variables listed above) but not the multivariable Cox regression.

<sup>b</sup> hazard ratio after applying sequentially the IPTW and the Cox regression including the covariables STEMI, multivessel disease, angiotypes 2A+3, TIMI flow 3 and DAPT.
